# Supplementary material for: CircADAMTS16 Inhibits Differentiation and Promotes Proliferation of Bovine Adipocytes by Targeting miR-10167-3p
Source: MDPI journal article supplement (doi:10.3390/cells12081175), 2023-04-17
Supplement: s1 [file s1]

Chromosome20 Bos-ADAMTS16(XM\_024981542 ) 4891 bp mRNA CDS: 135..3875

964-1513 >chr20\_68316347\_68309437\_-6910-ADAMTS16

ACATGCCCCAAGCCTCCCAAAGAAGACCTTTTCATCCTGCCGGATGAGTATAAATCATGTGTAAGGCAAAAGCGCTCCCTTCTGAAGTCCCAT  
AGGAATGAAGAGCTGAATGTGGAGACGCTGGTGGTGGTTGACAAAAAGATGATGCAAAACCATGGCCATGAAAACATCACCACCTACGTGCT  
GACAGTTCTCAACATGGTGTCTGCTTTATTCAAAGACGGGACAATAGGAGGGAATATCAACATTGCCATTGTCGCCCTGATTCTTCTGGAAG  
AGGAACAGCCAGGGTTGGTGATAAGCCATCACGCGGACCACAGCCTGAGCAGCTTCTGCCAGTGGCAGTCTGGACTGACGGGAAAGATGGG  
GCTCGCCACGACCAGCCATCTTACTCACCGGCCTGGACATATGCTCCTGGAAGAACGAGCCCTGTGACACCCTGGGATTTCGCACCCATCAG  
TGGCATGTGCAGTAAATACCGCAGCTGTACGATTAATGAGGACACGGGTCTTGGACTGGCCTTCACCATCGCCACGAGTCTGGACACAA
