# Supplementary material for: CircADAMTS16 Inhibits Differentiation and Promotes Proliferation of Bovine Adipocytes by Targeting miR-10167-3p
Source: MDPI journal article supplement (doi:10.3390/cells12081175), 2023-04-17
Supplement: s1 [file s1]

## Supplementary Material

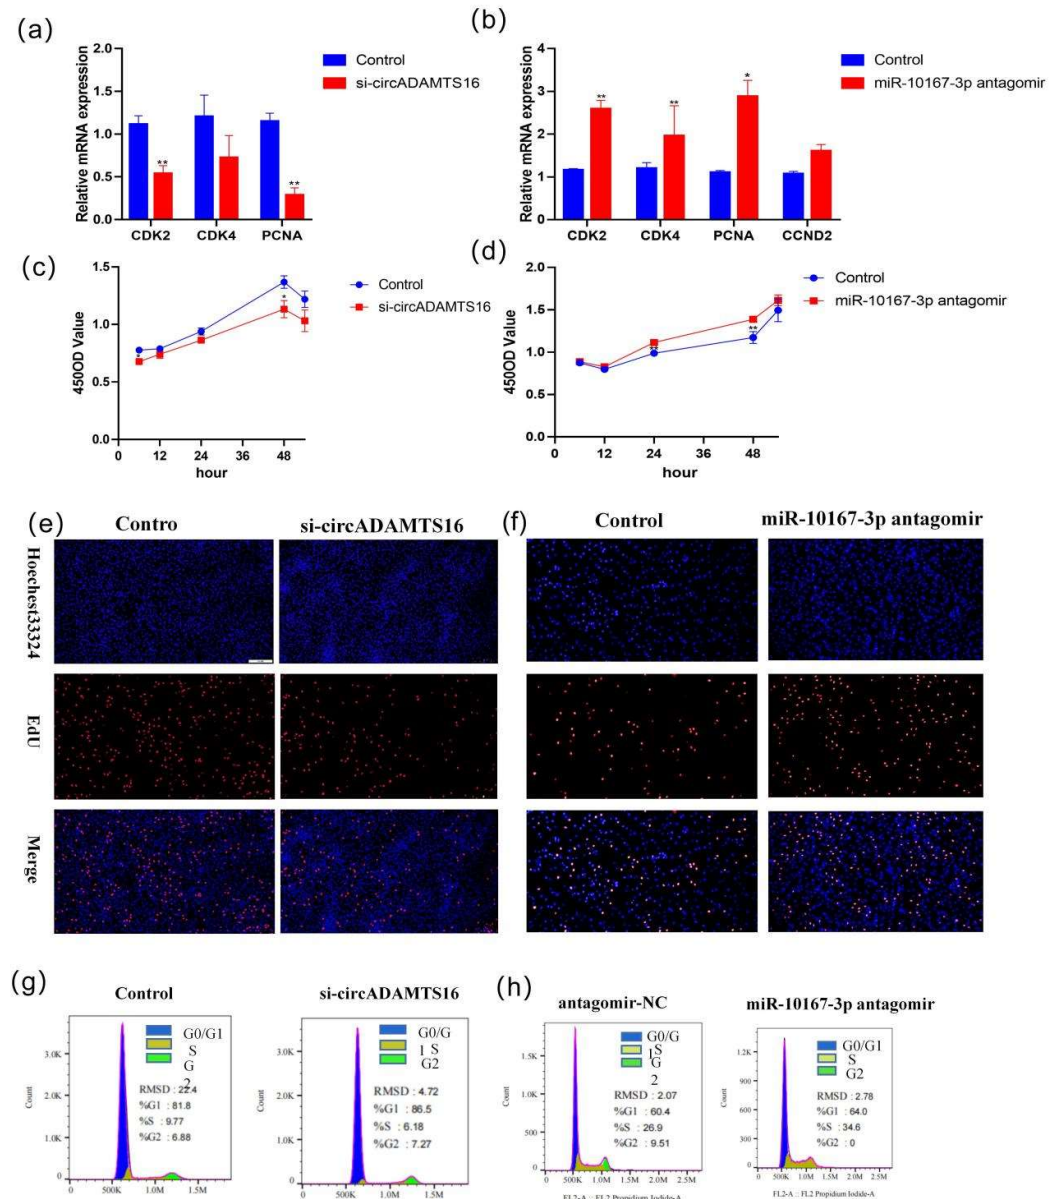

**Supplementary figure 1.** circADAMTS16 promotes the proliferation of bovine adipocytes by targeting miR-10167-3p. **(a-b)** qPCR was used to detect the mRNA expression levels of proliferation genes *CDK2*, *CDK4*, *PCNA* and *CCND2* after transfection of si-circADAMTS16 and miR-10167-3p antagonist, respectively, **(c-d)** The viability of si-circADAMTS16 and miR-10167-3p antagonist transfected cells was detected by CCK-8, **(e-f)** si-circADAMTS16 and miR-10167-3p antagonist were transfected into bovine adipocytes respectively, cell proliferation was detected by EdU, **(g-h)** Cell cycle was analyzed by flow cytometry. Scale bar indicates 200  $\mu$ m. \*  $P < 0.05$ , \*\*  $P < 0.01$ .

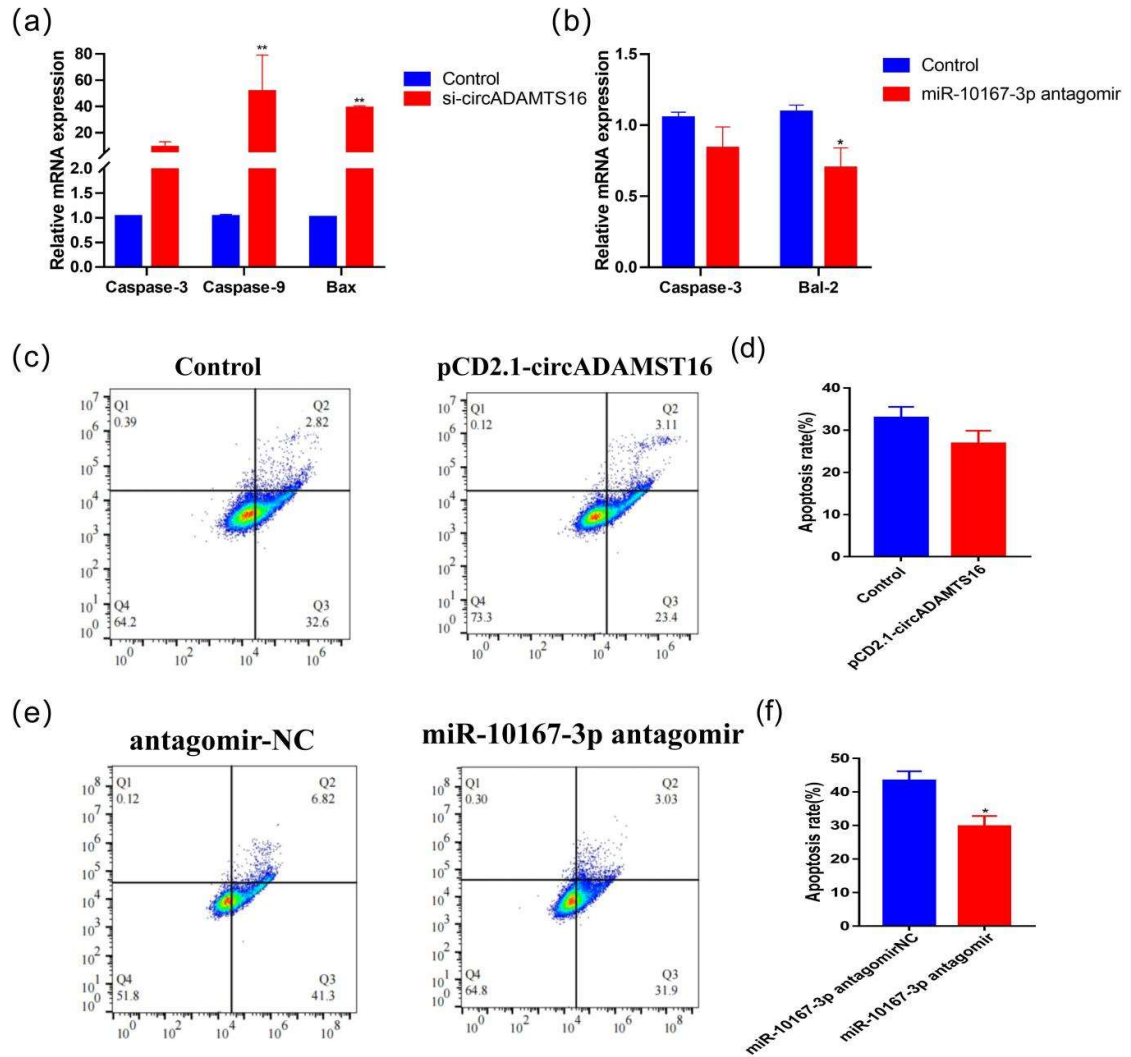

**Supplementary figure 2.** circADAMTS16 inhibits bovine adipocyte apoptosis by targeting miR-10167-3p. (a-b) The mRNA expression levels of apoptotic gene were detected after transfection of si-circADAMTS16 and miR-10167-3p antagomir into bovine adipocytes, respectively, (c-d) Apoptosis was assessed by flow cytometry and apoptosis rate following overexpression of circADAMTS16, (e-f) Apoptosis assessed by flow cytometry and apoptosis rate after interference with miR-10167-3p. \*  $P < 0.05$ , \*\*  $P < 0.01$ .
